# Supplementary material
Source: ML conference proceedings conference paper supplement (https://openaccess.thecvf.com/content/CVPR2023/html/Shin_Local_Connectivity-Based_Density_CVPR_2023_paper.html)
Supplement: Supplementary file 1 [file Shin_Local_Connectivity-Based_Density_CVPR_2023_supplemental.pdf]

# Supplementary Material for Local Connectivity-Based Density Estimation for Face Clustering

Junho Shin, Hyo-Jun Lee, Hyunseop Kim, Jong-Hyeon Baek, Daehyun Kim, Yeong Jun Koh\*  
Chungnam National University

{wnsgh8190, gywns6287, hyunseop95, whdgusdl197, seven776484}@gmail.com, yjkoh@cnu.ac.kr

## S-1. Supplemental of Ablation Study

In the main paper, we provided partial ablation study results due to the page limit. In this supplementary material, we additionally provide ablation study results in Tables S-1~ S-6. Tables S-1 and S-2 provide ablation study results on  $F_{512}$  and  $F_{1024}$  in IJB-B, which are omitted in Tables 4 and 6 in the main paper. Tables S-1 and S-2 show that the proposed local connectivity-based method and PCENet, respectively, are effective for clustering. Tables S-3~ S-5 supplement Table 5 in the main paper, which analyzes the proposed edge selection strategies. Tables S-3~ S-5 show ablation study results of edge selection strategies on remaining datasets not in Table 5. They demonstrate that the proposed edge selection method significantly improves recall scores by increasing positive pairs (P.P) while reducing negative pairs (N.P).

Table S-1. Ablation study on IJB-B for the local connectivity.

| Datasets                | IJB-B        |              |              |              |
|-------------------------|--------------|--------------|--------------|--------------|
|                         | $F_{512}$    |              | $F_{1024}$   |              |
| Methods/ Metrics        | $F_P$        | $F_B$        | $F_P$        | $F_B$        |
| Similarity (Sim.)       | 92.50        | 83.96        | 92.24        | 83.98        |
| Local Connectivity (LC) | 92.70        | 85.04        | 91.17        | 84.33        |
| Sim. + LC               | <b>93.05</b> | <b>85.09</b> | <b>92.66</b> | <b>85.15</b> |

Table S-2. Comparison of PCENet with LCENet on IJB-B.

| Datasets         | IJB-B        |              |              |              |
|------------------|--------------|--------------|--------------|--------------|
|                  | $F_{512}$    |              | $F_{1024}$   |              |
| Methods/ Metrics | $F_P$        | $F_B$        | $F_P$        | $F_B$        |
| LCENet           | 89.09        | 80.31        | 85.21        | 79.64        |
| PCENet           | <b>93.05</b> | <b>85.09</b> | <b>92.66</b> | <b>85.15</b> |

Table S-3. Ablation study on MS-Celeb-1M (1.74M, 2.89M) according to edge selection strategies.

|       | Sim. | LC | $\tilde{\mathcal{E}}_d$ | $\tilde{\mathcal{E}}_s$ | MS-Celeb-1M (1.74M) |        |        |           |         | MS-Celeb-1M (2.89M)      |           |        |       |           |         |                          |
|-------|------|----|-------------------------|-------------------------|---------------------|--------|--------|-----------|---------|--------------------------|-----------|--------|-------|-----------|---------|--------------------------|
|       |      |    |                         |                         | BCubed              |        | BCubed |           |         | BCubed                   |           | BCubed |       |           | BCubed  |                          |
|       |      |    |                         |                         | Precision           | Recall | $F_B$  | P.P.      | N.P.    | $\frac{P.P.}{P.P.+N.P.}$ | Precision | Recall | $F_B$ | P.P.      | N.P.    | $\frac{P.P.}{P.P.+N.P.}$ |
| $S_1$ | ✓    | ✓  |                         |                         | 96.86               | 81.36  | 88.44  | 1,626,026 | 105,452 | 93.91%                   | 96.49     | 78.64  | 86.66 | 2,677,760 | 198,549 | 93.10%                   |
| $S_2$ | ✓    | ✓  | ✓                       |                         | 95.65               | 85.75  | 90.43  | 1,643,394 | 86,820  | 94.98%                   | 95.16     | 83.39  | 88.88 | 2,711,091 | 163,001 | 94.33%                   |
| $S_3$ | ✓    | ✓  | ✓                       | ✓                       | 95.63               | 86.39  | 90.78  | 4,464,245 | 94,835  | 97.92%                   | 95.13     | 84.11  | 89.28 | 7,333,456 | 189,103 | 97.49%                   |

Table S-4. Ablation study on MS-Celeb-1M (4.05M, 5.21M) according to edge selection strategies.

|       | Sim. | LC | $\tilde{\mathcal{E}}_d$ | $\tilde{\mathcal{E}}_s$ | MS-Celeb-1M (4.05M) |        |        |            |         | MS-Celeb-1M (5.21M)      |           |        |       |            |         |                          |
|-------|------|----|-------------------------|-------------------------|---------------------|--------|--------|------------|---------|--------------------------|-----------|--------|-------|------------|---------|--------------------------|
|       |      |    |                         |                         | BCubed              |        | BCubed |            |         | BCubed                   |           | BCubed |       |            | BCubed  |                          |
|       |      |    |                         |                         | Precision           | Recall | $F_B$  | P.P.       | N.P.    | $\frac{P.P.}{P.P.+N.P.}$ | Precision | Recall | $F_B$ | P.P.       | N.P.    | $\frac{P.P.}{P.P.+N.P.}$ |
| $S_1$ | ✓    | ✓  |                         |                         | 96.13               | 76.66  | 85.30  | 3,721,871  | 302,085 | 92.49%                   | 95.81     | 75.20  | 84.26 | 4,768,518  | 413,872 | 92.01%                   |
| $S_2$ | ✓    | ✓  | ✓                       |                         | 94.76               | 81.65  | 87.72  | 3,775,715  | 248,040 | 93.84%                   | 94.44     | 80.35  | 86.83 | 4,837,244  | 340,691 | 93.42%                   |
| $S_3$ | ✓    | ✓  | ✓                       | ✓                       | 94.72               | 82.43  | 88.15  | 10,152,648 | 296,686 | 97.16%                   | 94.40     | 81.16  | 87.28 | 12,916,446 | 419,347 | 96.86%                   |

Table S-5. Ablation study on IJB-B ( $F_{512}$ ,  $F_{1024}$ ) according to edge selection strategies.

|       | Sim. | LC | $\tilde{\mathcal{E}}_d$ | $\tilde{\mathcal{E}}_s$ | IJB-B ( $F_{512}$ ) |        |        |         |       | IJB-B ( $F_{1024}$ )     |           |        |       |         |        |                          |
|-------|------|----|-------------------------|-------------------------|---------------------|--------|--------|---------|-------|--------------------------|-----------|--------|-------|---------|--------|--------------------------|
|       |      |    |                         |                         | BCubed              |        | BCubed |         |       | BCubed                   |           | BCubed |       |         | BCubed |                          |
|       |      |    |                         |                         | Precision           | Recall | $F_B$  | P.P.    | N.P.  | $\frac{P.P.}{P.P.+N.P.}$ | Precision | Recall | $F_B$ | P.P.    | N.P.   | $\frac{P.P.}{P.P.+N.P.}$ |
| $S_1$ | ✓    |    | ✓                       |                         | 96.63               | 74.34  | 84.03  | 15,527  | 2,615 | 85.59%                   | 96.24     | 72.71  | 82.84 | 30,928  | 5,107  | 85.83%                   |
| $S_2$ | ✓    | ✓  | ✓                       |                         | 96.37               | 74.25  | 83.88  | 15,662  | 2,481 | 86.33%                   | 95.99     | 74.66  | 83.99 | 31,217  | 4,816  | 86.63%                   |
| $S_3$ | ✓    | ✓  | ✓                       | ✓                       | 96.37               | 76.18  | 85.09  | 144,985 | 2,982 | 97.98%                   | 95.99     | 75.51  | 85.15 | 257,186 | 6,835  | 97.41%                   |

Table S-6. Ablation study on DeepFashion according to edge selection strategies.

|       | Sim. | LC | $\tilde{\mathcal{E}}_d$ | $\tilde{\mathcal{E}}_s$ | DeepFashion |        |        |        |       |                          |
|-------|------|----|-------------------------|-------------------------|-------------|--------|--------|--------|-------|--------------------------|
|       |      |    |                         |                         | BCubed      |        | BCubed |        |       |                          |
|       |      |    |                         |                         | Precision   | Recall | $F_B$  | P.P.   | N.P.  | $\frac{P.P.}{P.P.+N.P.}$ |
| $S_1$ | ✓    |    | ✓                       |                         | 83.12       | 52.21  | 64.13  | 17,451 | 8,458 | 67.35%                   |
| $S_2$ | ✓    | ✓  | ✓                       |                         | 83.48       | 52.16  | 64.20  | 17,688 | 7,743 | 69.55%                   |
| $S_3$ | ✓    | ✓  | ✓                       | ✓                       | 82.75       | 52.93  | 64.56  | 22,325 | 7,985 | 73.66%                   |

## S-2. How performance depends on $K$

The proposed method has hyperparameter  $K$  to construct  $K$ NN graph. Tables S-7~ S-9 list clustering performance according to  $K$  on MS-Celeb-1M, IJB-B, and DeepFashion respectively. We observe that stable performance is achieved when  $K$  is large enough. These results indicate that the proposed method does not depend on  $K$ .

For MS-Celeb-1M, we pick  $K = 80$  as done in most existing face clustering methods. In contrast, diverse hyperparameters are used in L-GCN [24] ( $K = 200$ ), DANet [6] ( $K = 256$ ), and Pairwise [12] ( $K = 40$ ). Therefore, we select  $K = 120$ , which produces the best performance on IJB-B dataset. For DeepFashion, we use  $K = 8$  to maintain the consistent model of eight multi-heads in LCENet and PCENet regardless of datasets, even if  $K = 10$  produces the best result.

Table S-7. Clustering results on MS-Celeb-1M according to  $K$ . The results of the proposed method ( $K = 80$ ) are boldfaced.

| Datasets      | MS-Celeb-1M  |              |              |              |              |              |              |              |              |              |
|---------------|--------------|--------------|--------------|--------------|--------------|--------------|--------------|--------------|--------------|--------------|
|               | 584K         |              | 1.74M        |              | 2.89M        |              | 4.05M        |              | 5.21M        |              |
| $K$ / Metrics | $F_P$        | $F_B$        |
| $K = 64$      | 94.33        | 93.25        | 91.21        | 90.40        | 89.35        | 88.76        | 87.77        | 87.55        | 86.21        | 86.60        |
| $K = 72$      | 93.97        | 93.07        | 91.07        | 90.49        | 89.08        | 88.99        | 87.44        | 87.89        | 86.08        | 87.03        |
| $K = 80$      | <b>94.64</b> | <b>93.36</b> | <b>91.90</b> | <b>90.78</b> | <b>90.27</b> | <b>89.28</b> | <b>88.69</b> | <b>88.15</b> | <b>87.35</b> | <b>87.28</b> |
| $K = 88$      | 94.43        | 93.29        | 91.76        | 90.59        | 89.98        | 89.05        | 88.52        | 87.82        | 87.19        | 86.87        |
| $K = 96$      | 93.97        | 93.06        | 90.77        | 90.31        | 88.74        | 88.75        | 86.74        | 87.54        | 84.98        | 86.59        |

Table S-8. Clustering results on IJB-B according to  $K$ . The results of the proposed method ( $K = 120$ ) are boldfaced.

| Datasets      | IJB-B        |              |              |              |              |              |
|---------------|--------------|--------------|--------------|--------------|--------------|--------------|
|               | $F_{512}$    |              | $F_{1024}$   |              | $F_{1845}$   |              |
| $K$ / Metrics | $F_P$        | $F_B$        | $F_P$        | $F_B$        | $F_P$        | $F_B$        |
| $K = 80$      | 92.71        | 84.88        | 91.42        | 84.60        | 88.80        | 83.94        |
| $K = 104$     | 92.71        | 84.91        | 90.79        | 84.54        | 85.06        | 83.99        |
| $K = 112$     | 92.65        | 85.06        | 90.98        | 84.70        | 84.83        | 84.04        |
| $K = 120$     | <b>93.05</b> | <b>85.09</b> | <b>92.66</b> | <b>85.15</b> | <b>90.78</b> | <b>84.81</b> |
| $K = 128$     | 93.09        | 85.10        | 92.40        | 84.91        | 87.53        | 84.46        |

Table S-9. Clustering results on DeepFashion according to  $K$ . The results of the proposed method ( $K = 8$ ) are boldfaced.

| Datasets      | DeepFashion  |              |
|---------------|--------------|--------------|
| $K$ / Metrics | $F_P$        | $F_B$        |
| $K = 5$       | 39.79        | 64.47        |
| $K = 8$       | <b>41.76</b> | <b>64.56</b> |
| $K = 10$      | 42.30        | 65.08        |
| $K = 16$      | 42.84        | 63.85        |

### S-3. The connecting threshold $\tau$

The proposed method computes the connecting threshold  $\tau$  to construct  $\tilde{\mathcal{E}}_s$  by averaging similarities between each node and its 3-nearest neighbors for each dataset as in Table S-10. In Tables S-11 and S-12, we compare clustering performance according to the number of nearest neighbors to compute the connecting threshold. We observe that stable performance is obtained regardless of the number of nearest neighbors, which indicates that the proposed method does not depend on  $\tau$ . We pick 3-nearest neighbors, which provide reliable performance.

Table S-10.  $\tau$  according to datasets.

| Datasets     | MS-Celeb-1M |        |        |        |        | IJB-B     |            |            | DeepFashion |
|--------------|-------------|--------|--------|--------|--------|-----------|------------|------------|-------------|
|              | 584K        | 1.74M  | 2.89M  | 4.05M  | 5.21M  | $F_{512}$ | $F_{1024}$ | $F_{1845}$ | -           |
| $\tau$ (3NN) | 0.8339      | 0.8347 | 0.8358 | 0.8363 | 0.8367 | 0.7498    | 0.7464     | 0.7550     | 0.8840      |

Table S-11. Clustering results on MS-Celeb-1M according to the number of nearest neighbors to compute  $\tau$ .

| Datasets           | MS-Celeb-1M |       |       |       |       |       |       |       |       |       |
|--------------------|-------------|-------|-------|-------|-------|-------|-------|-------|-------|-------|
|                    | 584K        |       | 1.74M |       | 2.89M |       | 4.05M |       | 5.21M |       |
| Neighbors/ Metrics | $F_P$       | $F_B$ | $F_P$ | $F_B$ | $F_P$ | $F_B$ | $F_P$ | $F_B$ | $F_P$ | $F_B$ |
| 1-neighbors        | 94.47       | 93.26 | 91.84 | 90.69 | 90.21 | 89.18 | 88.76 | 88.04 | 87.31 | 87.16 |
| 2-neighbors        | 94.52       | 93.31 | 91.88 | 90.74 | 90.26 | 89.24 | 88.70 | 88.11 | 87.31 | 87.23 |
| 3-neighbors        | 94.64       | 93.36 | 91.90 | 90.78 | 90.27 | 89.28 | 88.69 | 88.15 | 87.35 | 87.28 |
| 4-neighbors        | 94.71       | 93.39 | 91.95 | 90.80 | 90.28 | 89.32 | 88.67 | 88.18 | 87.21 | 87.32 |
| 5-neighbors        | 94.71       | 93.40 | 91.95 | 90.82 | 90.31 | 89.35 | 88.66 | 88.22 | 87.17 | 87.35 |

Table S-12. Clustering results on IJB-B and DeepFashion according to the number of nearest neighbors to compute  $\tau$ .

| Datasets           | IJB-B     |       |            |       |            |       | DeepFashion |       |
|--------------------|-----------|-------|------------|-------|------------|-------|-------------|-------|
|                    | $F_{512}$ |       | $F_{1024}$ |       | $F_{1845}$ |       | -           |       |
| Neighbors/ Metrics | $F_P$     | $F_B$ | $F_P$      | $F_B$ | $F_P$      | $F_B$ | $F_P$       | $F_B$ |
| 1-neighbors        | 93.05     | 85.09 | 92.66      | 85.15 | 81.01      | 83.64 | 41.59       | 64.45 |
| 2-neighbors        | 93.05     | 85.09 | 92.66      | 85.15 | 84.88      | 84.19 | 41.54       | 64.51 |
| 3-neighbors        | 93.05     | 85.09 | 92.66      | 85.15 | 90.78      | 84.81 | 41.76       | 64.56 |
| 4-neighbors        | 93.05     | 85.09 | 92.66      | 85.15 | 90.78      | 84.81 | 41.59       | 64.61 |
| 5-neighbors        | 93.05     | 85.09 | 92.66      | 85.15 | 90.78      | 84.81 | 41.54       | 64.61 |

### S-4. Additional experiments

**Ratios of true positive connection:** Table S-13 shows ratios of true positive connection according to the procedures:  $K$ NN graph, LCENet for  $\tilde{\mathcal{E}}_d$  PCENet, and Graph edge selection for  $\tilde{\mathcal{E}}_s$ .

Table S-13. True positive connection ratio according to the procedures.

|                                                                       | MS-Celeb-1M (584K) |            |                          |
|-----------------------------------------------------------------------|--------------------|------------|--------------------------|
|                                                                       | P.P.               | N.P.       | $\frac{P.P.}{P.P.+N.P.}$ |
| $K$ NN graph                                                          | 32,930,669         | 13,790,371 | 70.48%                   |
| LCENet for $\tilde{\mathcal{E}}_d$                                    | 558,304            | 22,032     | 96.20%                   |
| LCENet for $\tilde{\mathcal{E}}_d$ + PCENet                           | 554,271            | 6,383      | 98.86%                   |
| LCENet for $\tilde{\mathcal{E}}_d$ + PCENet + $\tilde{\mathcal{E}}_s$ | 1,525,634          | 7,198      | 99.53%                   |

**Clustering with PCENet:** There are two options for clustering with PCENet only. The first is  $S_1$  in Table 5 in main paper. The second is to estimate all local connectivity  $KN$  pairs for each node using PCENet. We refer this option to  $S_4$  as in Table S-14.

Table S-14. Clustering with PCENet only.

|       | MS-Celeb-1M (584K) |       | IJB-B ( $F_{1845}$ ) |       | DeepFashion |       |
|-------|--------------------|-------|----------------------|-------|-------------|-------|
|       | $F_P$              | $F_B$ | $F_P$                | $F_B$ | $F_P$       | $F_B$ |
| $S_4$ | 94.12              | 93.10 | 90.44                | 84.82 | 41.23       | 64.94 |

**Binary classification:** Table S-15 shows binary classification scores of PCENet. It provides reliable  $F_1$  scores on MS-Celeb-1M and IJB-B, while providing relatively low scores on DeepFashion.

Table S-15. Binary classification performance.

|        | MS-Celeb-1M (584K) |        |       | IJB-B ( $F_{1845}$ ) |        |       | DeepFashion |        |       |
|--------|--------------------|--------|-------|----------------------|--------|-------|-------------|--------|-------|
|        | Precision          | Recall | $F_1$ | Precision            | Recall | $F_1$ | Precision   | Recall | $F_1$ |
| PCENet | 98.86              | 99.28  | 99.07 | 97.37                | 96.70  | 97.03 | 86.18       | 87.99  | 87.08 |

**BCubed scores for PCENet:** As in Table S-16, PCENet reduces the BCubed recall, but it extremely improves the BCubed precision, resulting in the good  $F$  scores.

Table S-16. Clustering performance according to PCENet.

|            | MS-Celeb-1M (584K) |       |       | IJB-B ( $F_{1845}$ ) |       |       | DeepFashion |       |       |
|------------|--------------------|-------|-------|----------------------|-------|-------|-------------|-------|-------|
|            | Pre                | Rec   | $F_B$ | Pre                  | Rec   | $F_B$ | Pre         | Rec   | $F_B$ |
| w/o PCENet | 45.33              | 92.58 | 60.86 | 17.66                | 81.01 | 29.00 | 29.42       | 66.78 | 40.84 |
| PCENet     | 96.65              | 90.28 | 93.36 | 95.78                | 76.10 | 84.81 | 82.75       | 52.93 | 64.56 |
